# Supplementary material
Source: publisher figshare collection journal article supplement (https://acs.figshare.com/ndownloader/files/5076973)

# The Iptycene Chemistry: New Pentiptycene Building Blocks Derived from Pentiptycene Quinones

Jye-Shane Yang\*<sup>†</sup> and Ching-Wei Ko<sup>‡</sup>

<sup>†</sup>Department of Chemistry, National Taiwan University, Taipei, Taiwan, 10617 and

<sup>‡</sup>Department of Chemistry, National Central University, Chungli, Taiwan 32054

[jsyang@ntu.edu.tw](mailto:jsyang@ntu.edu.tw)

**Supporting Information Available.** Experimental procedures and characterization data for compounds **17-24** and <sup>1</sup>H and <sup>13</sup>C NMR spectra of **13**, **14**, and **17-24**.

## Contents:

|     |                                                           |
|-----|-----------------------------------------------------------|
| S1  | Table of contents                                         |
| S2  | Synthesis of Compounds <b>17</b> and <b>18</b>            |
| S3  | Synthesis of Compounds <b>19</b> and <b>20</b>            |
| S4  | Synthesis of Compound <b>21</b>                           |
| S5  | Synthesis of Compounds <b>22</b> and <b>23</b>            |
| S6  | Synthesis of Compound <b>24</b>                           |
| S7  | <sup>1</sup> H & <sup>13</sup> C NMR spectra of <b>13</b> |
| S9  | <sup>1</sup> H & <sup>13</sup> C NMR spectra of <b>14</b> |
| S11 | <sup>1</sup> H & <sup>13</sup> C NMR spectra of <b>17</b> |
| S13 | <sup>1</sup> H & <sup>13</sup> C NMR spectra of <b>18</b> |
| S15 | <sup>1</sup> H & <sup>13</sup> C NMR spectra of <b>19</b> |
| S17 | <sup>1</sup> H & <sup>13</sup> C NMR spectra of <b>20</b> |
| S19 | <sup>1</sup> H & <sup>13</sup> C NMR spectra of <b>21</b> |
| S21 | <sup>1</sup> H & <sup>13</sup> C NMR spectra of <b>22</b> |
| S23 | <sup>1</sup> H & <sup>13</sup> C NMR spectra of <b>23</b> |
| S25 | <sup>1</sup> H & <sup>13</sup> C NMR spectra of <b>24</b> |

**Synthesis of Compound 17.** A mixture of **13** (2.0 g, 4.5 mmol), K<sub>2</sub>CO<sub>3</sub> (0.9 g, 6.5 mmol), KI (1.1 g, 6.6 mmol), 1-bromooctane (1.3 g, 6.7 mmol), and 100 mL of acetone in a 250-mL flask was heated to reflux for 16 h. The acetone was removed under reduced pressure and the residue was then dissolved in CH<sub>2</sub>Cl<sub>2</sub> and washed with 20% HCl<sub>(aq)</sub>. The organic layer was dried over anhydrous MgSO<sub>4</sub> and the filtrate was concentrated under reduced pressure. Column chromatography with CH<sub>2</sub>Cl<sub>2</sub>/hexane (1:1) as eluent afforded the white solid of **17** with a yield of 91%.

M.P. 278-279 °C; <sup>1</sup>H-NMR (500 MHz, CDCl<sub>3</sub>) δ: 0.98 (t, *J* = 6.8 Hz, 3H), 1.39-1.55 (m, 8H), 1.69 (quin, *J* = 7.6 Hz, 2H), 2.03 (tt, *J* = 6.8 and 7.6 Hz, 2 H), 3.96 (t, *J* = 6.8 Hz, 2H), 5.32 (s, 2H), 5.69 (s, 2H), 6.93-6.99 (m, 8H), 7.26 (s, 1H), 7.31-7.34 (m, 8H) ppm; <sup>13</sup>C NMR (125 MHz, CDCl<sub>3</sub>) δ: 14.2, 22.7, 26.4, 29.4, 29.6, 30.6, 31.9, 48.1, 54.2, 76.0, 115.8, 123.4 (2C), 125.0, 125.1, 134.8, 144.3, 145.1, 145.7, 149.8 ppm; IR (KBr) 1221 cm<sup>-1</sup>; FAB-HRMS calcd for C<sub>42</sub>H<sub>38</sub>O (M<sup>+</sup>) 558.2923, found 558.2927.

**Synthesis of Compound 18.** A mixture of **17** (0.3 g, 0.54 mmol), Ag<sub>2</sub>SO<sub>4</sub> (0.8 g, 2.57 mmol), I<sub>2</sub> (0.7 g, 2.76 mmol), and 30 mL of ethanol in a 50-mL flask was heated to reflux for 3 h. The resulting precipitate was filtered off and the filtrate was concentrated under reduced pressure. The residue was then dissolved in CH<sub>2</sub>Cl<sub>2</sub> and washed with 0.1 M Na<sub>2</sub>SO<sub>3(aq)</sub> and brine. The organic layer was dried over anhydrous MgSO<sub>4</sub> and the filtrate was concentrated under reduced pressure. Column chromatography with CH<sub>2</sub>Cl<sub>2</sub>/hexane (1:3) as eluent afforded the white solid of **18** with a yield of 94%. M.P. 267-268 °C; <sup>1</sup>H NMR (400 MHz, CDCl<sub>3</sub>) δ: 0.95 (t, *J* = 6.9 Hz, 3H), 1.38-1.51 (m, 8H), 1.66 (quin, *J* = 7.6 Hz, 2H), 2.01 (tt, *J* = 6.9 and 7.6 Hz, 2H), 3.91 (t, *J* = 6.9 Hz, 2H), 5.67 (s, 2H), 5.80 (s, 2H), 6.93-6.99 (m, 8H), 7.31-7.40 (m, 8H) ppm; <sup>13</sup>C NMR (100

MHz, CDCl<sub>3</sub>)  $\delta$ : 14.2, 22.7, 26.4, 29.4, 29.6, 30.5, 31.9, 48.6, 58.6, 76.1, 88.7, 123.4, 123.9, 125.3, 125.4, 137.1, 144.9, 145.0, 147.0, 149.9 ppm; IR (KBr) 1219 cm<sup>-1</sup>; FAB-HRMS calcd for C<sub>42</sub>H<sub>37</sub>IO (M<sup>+</sup>) 684.1889, found 684.1897.

**Synthesis of Compound 19.** A mixture of **17** (0.5 g, 0.9 mmol), NBS (0.3 g, 1.7 mmol), and 10 mL of DMF in a 25-mL flask was heated to reflux for 48 h. The DMF was removed under reduced pressure and the residue was then dissolved in CH<sub>2</sub>Cl<sub>2</sub> and washed with brine. The organic layer was dried over anhydrous MgSO<sub>4</sub> and the filtrate was concentrated under reduced pressure. Column chromatography with CH<sub>2</sub>Cl<sub>2</sub>/hexane (1:1) as eluent afforded the white solid of **19** with a yield of 90%. M.P. 271-272 °C; <sup>1</sup>H NMR (500 MHz, CDCl<sub>3</sub>)  $\delta$ : 0.99 (t, *J* = 6.6 Hz, 3H), 1.42-1.57 (m, 8H), 1.70 (quin, *J* = 7.4 Hz, 2H), 2.04 (tt, *J* = 6.6 and 7.4 Hz, 2H), 3.95 (t, *J* = 6.6 Hz, 2H), 5.71 (s, 2H), 5.88 (s, 2H), 6.97-7.01 (m, 8H), 7.35-7.41 (m, 8H) ppm; <sup>13</sup>C NMR (125 MHz, CDCl<sub>3</sub>)  $\delta$ : 14.5, 23.1, 26.7, 29.7, 29.9, 30.9, 32.3, 48.9, 54.0, 76.5, 111.8, 123.8, 124.3, 125.6, 125.7, 137.9, 143.7, 145.2, 145.3, 149.2 ppm; IR (KBr) 1221 cm<sup>-1</sup>; FAB-HRMS calcd for C<sub>42</sub>H<sub>37</sub>BrO (M<sup>+</sup>) 636.2028, found 636.2040.

**Synthesis of Compound 20.** A mixture of **18** (0.2 g, 0.29 mmol), Pd(PPh<sub>3</sub>)<sub>4</sub> (0.04 g, 0.03 mmol), trimethylsilyl acetylene (0.05 mL, 0.35 mmol), 3 mL of benzene, and 3 mL of diisopropylamine was heated to 90 °C for 16 h under argon. The precipitate was filtered off and the filtrate was concentrated under reduced pressure. The residue was then dissolved in CH<sub>2</sub>Cl<sub>2</sub> and washed with brine. The organic layer was dried over anhydrous MgSO<sub>4</sub> and the filtrate was concentrated under reduced pressure. Column chromatography with CH<sub>2</sub>Cl<sub>2</sub>/hexane (1:6) as eluent afforded the white solid of **20** with a

yield of 90%. M.P. 257-258 °C; <sup>1</sup>H NMR (400 MHz, CDCl<sub>3</sub>) δ: 0.50 (s, 9H), 0.97 (t, *J* = 6.9 Hz, 3H), 1.38-1.49 (m, 8H), 1.65 (quin, *J* = 7.6 Hz, 2H), 2.00 (tt, *J* = 6.9 and 7.6 Hz, 2H), 3.95 (t, *J* = 6.8 Hz, 2H), 5.67 (s, 2H), 5.81 (s, 2H), 6.92-6.97 (m, 8H), 7.31-7.37 (m, 8H) ppm; <sup>13</sup>C NMR (100 MHz, CDCl<sub>3</sub>) δ: 0.4, 14.2, 22.8, 26.4, 29.4, 29.6, 30.5, 32.0, 48.2, 52.3, 76.1, 100.1, 101.0, 111.1, 123.4, 124.0, 125.2 (2C), 135.2, 145.0, 145.2, 146.1, 149.7 ppm; IR (KBr) 1264, 2147 cm<sup>-1</sup>; FAB-HRMS calcd for C<sub>47</sub>H<sub>46</sub>OSi (M<sup>+</sup>) 654.3318, found 654.3337.

**Synthesis of Compound 21.** A mixture of **18** (0.2 g, 0.29 mmol), Pd(OAc)<sub>2</sub> (0.01 g, 0.04 mmol), P(*o*-tolyl)<sub>3</sub> (0.02 g, 0.07 mmol), styrene (0.04 mL, 0.35 mmol), 2 mL of anhydrous DMF, and 2 mL of triethylamine was heated to 90 °C for 16 h under argon. The precipitate was filtered off and the filtrate was concentrated under reduced pressure. The residue was then dissolved in CH<sub>2</sub>Cl<sub>2</sub> and washed with brine. The organic layer was dried over anhydrous MgSO<sub>4</sub> and the filtrate was concentrated under reduced pressure. Column chromatography with CH<sub>2</sub>Cl<sub>2</sub>/hexane (1:5) as eluent afforded the white solid of **21** with a yield of 83%. M.P. 256-257 °C; <sup>1</sup>H NMR (500 MHz, CDCl<sub>3</sub>) δ: 0.96 (t, *J* = 6.7 Hz, 3H), 1.39-1.54 (m, 8H), 1.68 (quin, *J* = 7.5 Hz, 2H), 2.03 (tt, *J* = 6.7 and 7.5 Hz, 2 H), 3.95 (t, *J* = 6.7 Hz, 2H), 5.71 (s, 2H), 5.72 (s, 2H), 6.72, (d, *J* = 16.4 Hz, 1H), 6.93-6.95 (m, 8H), 7.28-7.33, (m, 8H), 7.42-7.56 (m, 4H), 7.73, (d, *J* = 7.4 Hz, 2H) ppm; <sup>13</sup>C NMR (125 MHz, CDCl<sub>3</sub>) δ: 14.2, 22.7, 26.5, 29.4, 29.6, 30.6, 32.0, 48.3, 51.1, 76.0, 123.5, 123.6, 124.1, 125.1 (2C), 126.3, 126.7, 128.1, 129.0, 135.0, 136.2, 137.3, 142.3, 145.3, 145.6, 149.0 ppm; IR (KBr) 972, 1266 cm<sup>-1</sup>; FAB-HRMS calcd for C<sub>50</sub>H<sub>44</sub>O (M<sup>+</sup>) 660.3392, found 660.3394.

**Synthesis of Compound 22.** A mixture of **18** (0.2 g, 0.29 mmol), Pd(dba)<sub>2</sub> (0.02 g, 0.03 mmol), PPh<sub>3</sub> (0.02 g, 0.08 mmol), phenylboronic acid (0.05 g, 0.40 mmol), Cs<sub>2</sub>CO<sub>3</sub> (0.4 g, 1.23 mmol), and 5 mL of anhydrous dioxane was heated to 100 °C for 16 h under argon. The precipitate was filtered off and the filtrate was concentrated under reduced pressure. The residue was then dissolved in CH<sub>2</sub>Cl<sub>2</sub> and washed with brine. The organic layer was dried over anhydrous MgSO<sub>4</sub> and the filtrate was concentrated under reduced pressure. Column chromatography with CH<sub>2</sub>Cl<sub>2</sub>/hexane (1:6) as eluent afforded the white solid of **22** with a yield of 83%. M.P. 160-161 °C; <sup>1</sup>H NMR (500 MHz, CDCl<sub>3</sub>) δ: 0.97 (t, *J* = 6.6 Hz, 3H), 1.40-1.56 (m, 8H), 1.71 (quin, *J* = 7.5 Hz, 2H), 2.06 (tt, *J* = 6.7 and 7.5 Hz, 2H), 3.99 (t, *J* = 6.7 Hz, 2H), 5.30 (s, 2H), 5.74 (s, 2H), 6.89-6.96 (m, 8H), 7.12-7.13 (m, 4H), 7.26-7.35 (m, 6H), 7.58-7.66 (m, 3H) ppm; <sup>13</sup>C NMR (125 MHz, CDCl<sub>3</sub>) δ: 14.5, 23.1, 26.8, 29.8, 30.0, 31.0, 32.3, 48.6, 51.6, 76.5, 123.8, 123.9, 125.4, 125.5, 127.7, 128.9, 130.2, 130.6, 134.9, 138.6, 142.6, 145.7, 146.0, 149.5 ppm; IR (KBr) 1266 cm<sup>-1</sup>; FAB-HRMS calcd for C<sub>48</sub>H<sub>42</sub>O (M<sup>+</sup>) 634.3236, found 634.3230.

**Synthesis of Compound 23.** A mixture of **19** (1.0 g, 1.6 mmol), CuCN (0.3 g, 3.3 mmol), and 15 mL of anhydrous NMP (*N*-methylpyrrolidone) was heated to 200 °C for 16 h under argon. After the reaction mixture was cooled to rt, CH<sub>2</sub>Cl<sub>2</sub> and water were added to dissolve the solids. The organic layer was dried over anhydrous MgSO<sub>4</sub> and the filtrate was concentrated under reduced pressure. Column chromatography with CH<sub>2</sub>Cl<sub>2</sub>/hexane (1:1) as eluent afforded the white solid of **23** with a yield of 87%. M.P. 281-282 °C; <sup>1</sup>H NMR (500 MHz, CDCl<sub>3</sub>) δ: 0.95 (t, *J* = 6.7 Hz, 3H), 1.38-1.54 (m, 8H), 1.66 (quin, *J* = 7.4 Hz, 2H), 2.01 (tt, *J* = 6.7 and 7.4 Hz, 2H), 4.00 (t, *J* = 6.7 Hz, 2H), 5.70 (s, 2H), 5.74 (s, 2H), 6.97-7.01 (m, 8H), 7.33-7.43 (m, 8H) ppm; <sup>13</sup>C NMR (125 MHz, CDCl<sub>3</sub>) δ: 14.5,

23.0, 26.6, 29.7, 29.9, 30.9, 32.3, 48.4, 52.8, 76.6, 100.6, 116.7, 123.9, 124.5, 126.0 (2C), 137.4, 144.4, 144.6, 148.3, 153.1 ppm; IR (KBr) 1260, 2224  $\text{cm}^{-1}$ ; FAB-HRMS calcd for  $\text{C}_{42}\text{H}_{37}\text{NO}$  ( $\text{M}^+$ ) 583.2875, found 583.2878.

**Synthesis of Compound 24.** To a solution of **23** (1.0 g, 1.7 mmol) in 20 mL of  $\text{CH}_2\text{Cl}_2$  at  $-20\text{ }^\circ\text{C}$  was added 3.4 mL of 1.0 M DIBAL-H (diisobutylaluminum hydride (3.4 mmol) in hexane under argon. The mixture was stirred and kept at  $-20\text{ }^\circ\text{C}$  for 16 h. The reaction was quenched by slowly adding 2 mL of concentrated  $\text{HCl}_{(\text{aq})}$ . The solution was then washed with brine. The organic layer was dried over anhydrous  $\text{MgSO}_4$  and the filtrate was concentrated under reduced pressure. Column chromatography with  $\text{CH}_2\text{Cl}_2$ /hexane (1:2) as eluent afforded the white solid of **24** with a yield of 91%. M.P.  $253\text{--}254\text{ }^\circ\text{C}$ ;  $^1\text{H}$  NMR (500 MHz,  $\text{CDCl}_3$ )  $\delta$ : 0.96 (t,  $J = 6.2\text{ Hz}$ , 3H), 1.39-1.54 (m, 8H), 1.69 (quin,  $J = 7.4\text{ Hz}$ , 2H), 2.04 (tt,  $J = 6.7\text{ and }7.4\text{ Hz}$ , 2H), 4.00 (t,  $J = 6.7\text{ Hz}$ , 2H), 5.74 (s, 2H), 6.57 (s, 2H), 6.96-6.98 (m, 8H), 7.33-7.39 (m, 8H), 10.95 (s, 1H) ppm;  $^{13}\text{C}$  NMR (125 MHz,  $\text{CDCl}_3$ )  $\delta$ : 14.5, 23.1, 26.7, 29.7, 29.9, 30.9, 32.3, 48.2, 49.0, 76.3, 123.6, 123.8, 124.5, 125.8 (2C), 137.3, 145.0 (2C C), 147.9, 153.8, 190.7 ppm; IR (KBr) 1275, 1688  $\text{cm}^{-1}$ ; FAB-HRMS calcd for  $\text{C}_{43}\text{H}_{38}\text{O}_2$  ( $\text{M}^+$ ) 586.2872, found 586.2870.

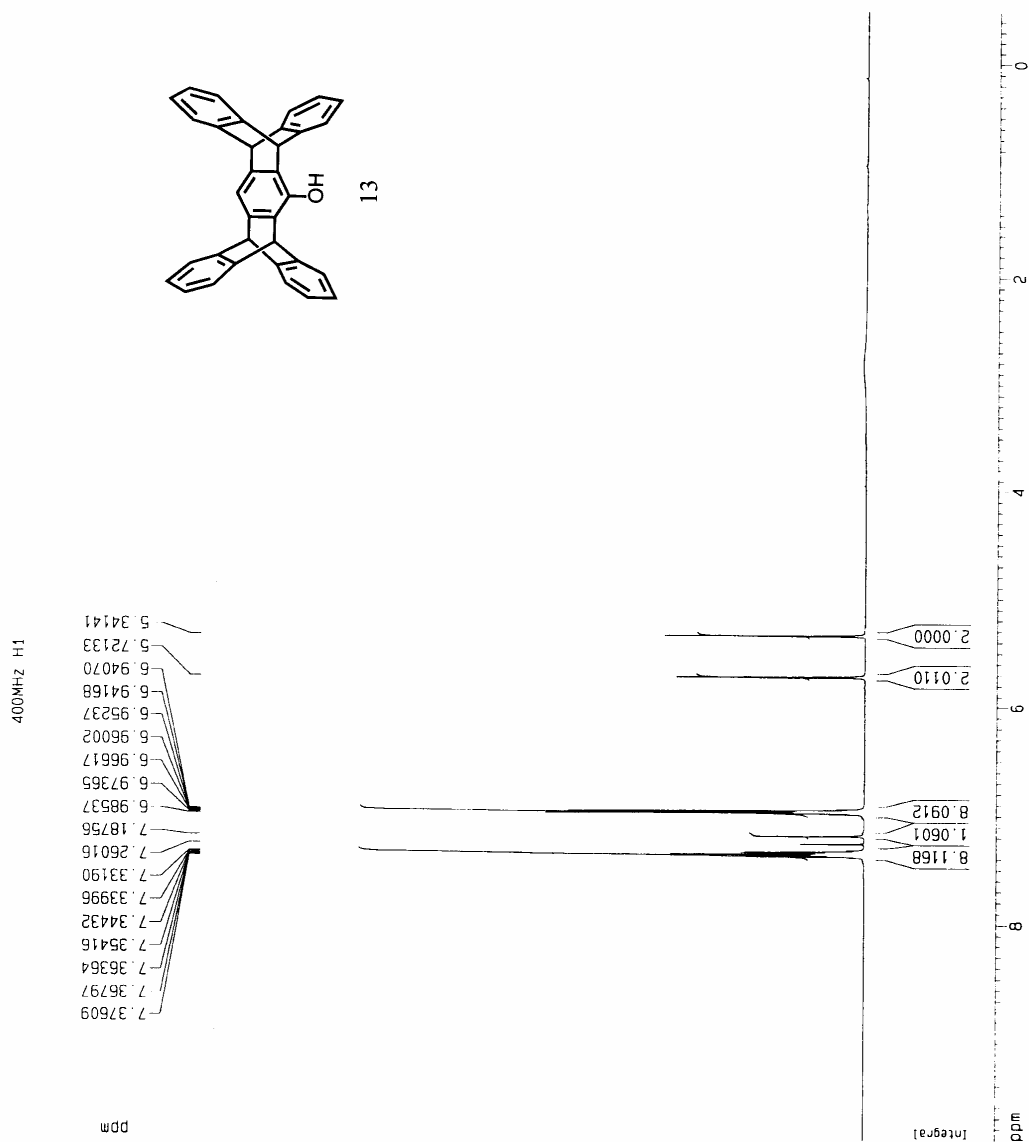

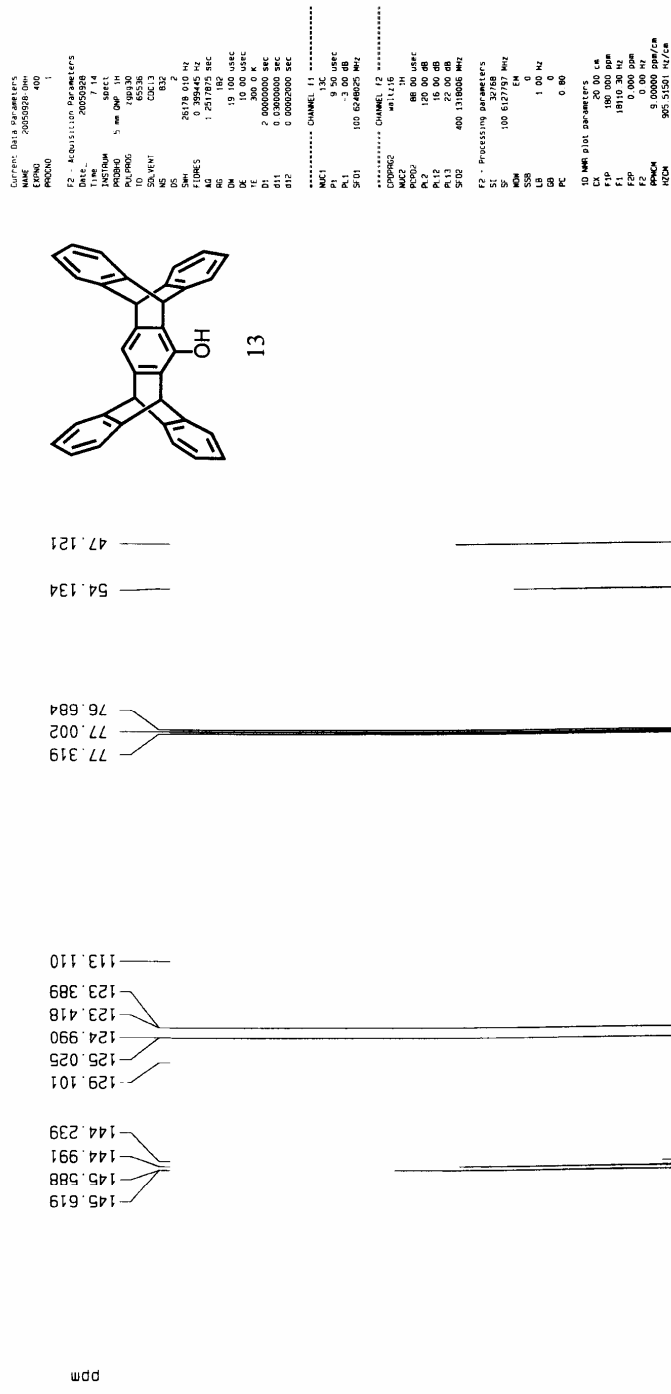



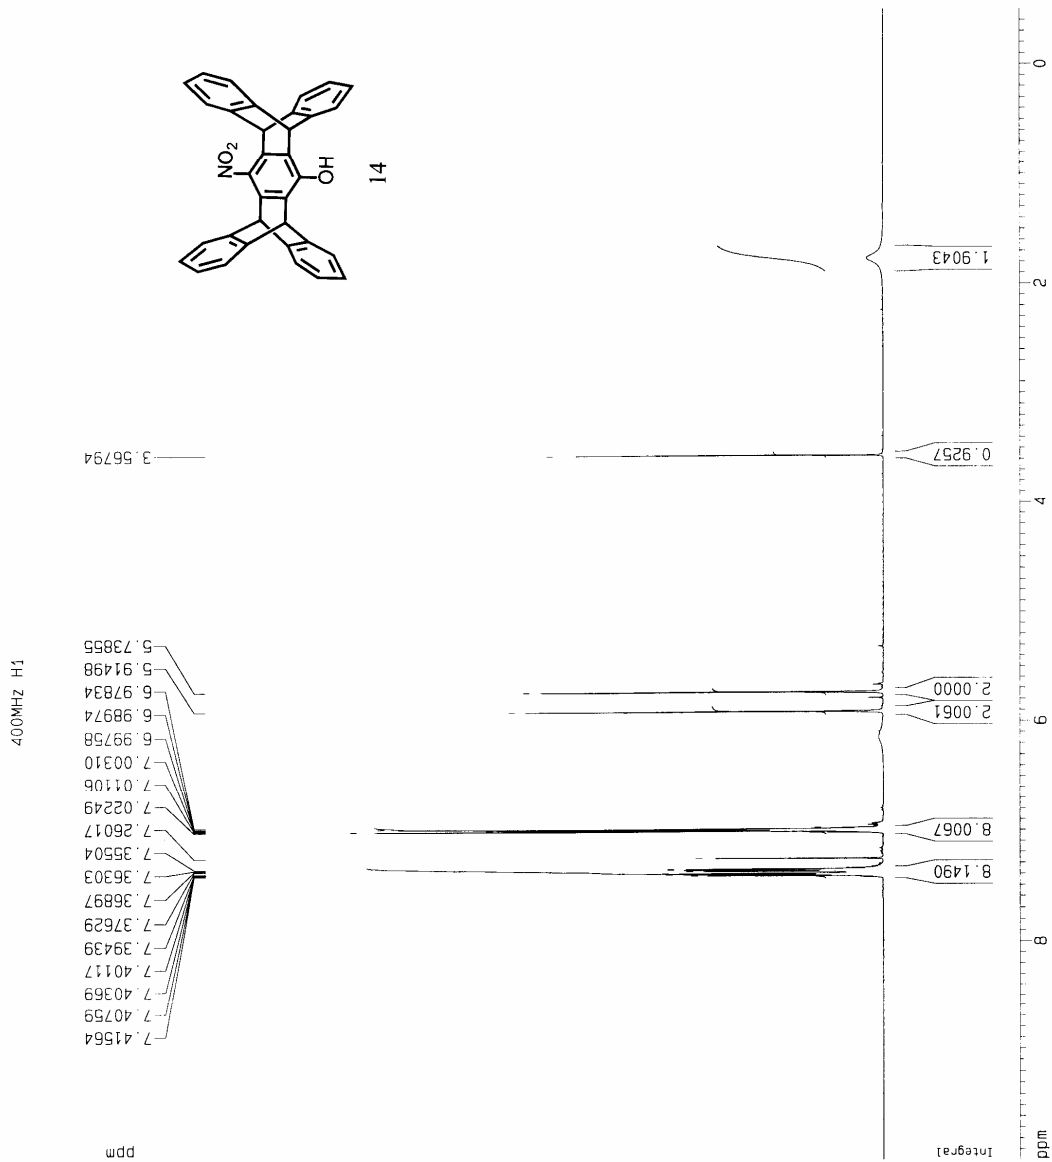

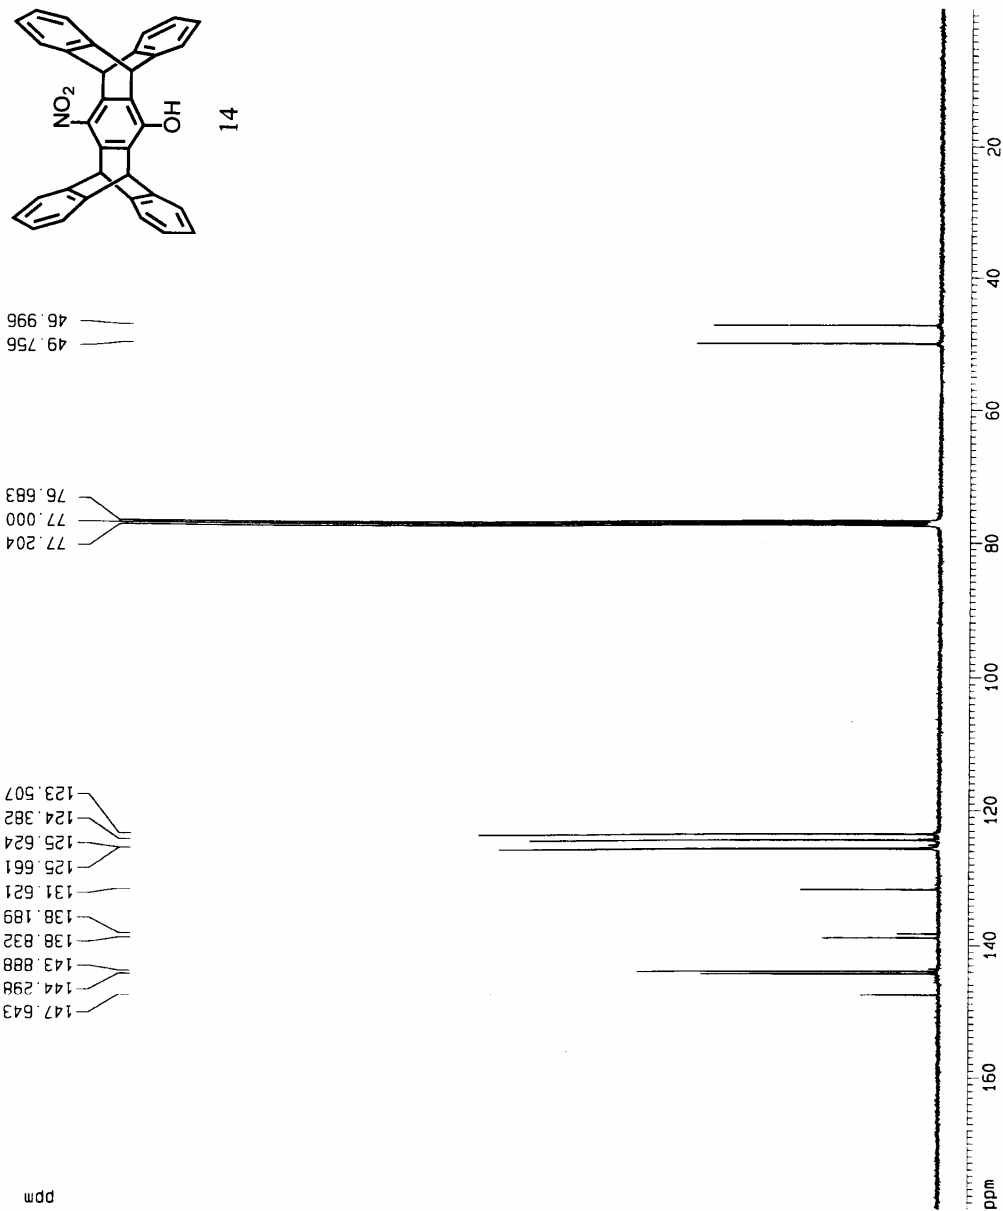

Current Data Parameters  
 Name: 20050328-HRD  
 Date: 20050328  
 Time: 4:03  
 Product: 1

F2 - Acquisition Parameters  
 Name: 20050328  
 Time: 0.23  
 Instrument: spect  
 P1: 5.00  
 P2: 1.00  
 P3: 1.00  
 P4: 1.00  
 P5: 1.00  
 P6: 1.00  
 P7: 1.00  
 P8: 1.00  
 P9: 1.00  
 P10: 1.00  
 P11: 1.00  
 P12: 1.00  
 P13: 1.00  
 P14: 1.00  
 P15: 1.00  
 P16: 1.00  
 P17: 1.00  
 P18: 1.00  
 P19: 1.00  
 P20: 1.00  
 P21: 1.00  
 P22: 1.00  
 P23: 1.00  
 P24: 1.00  
 P25: 1.00  
 P26: 1.00  
 P27: 1.00  
 P28: 1.00  
 P29: 1.00  
 P30: 1.00  
 P31: 1.00  
 P32: 1.00  
 P33: 1.00  
 P34: 1.00  
 P35: 1.00  
 P36: 1.00  
 P37: 1.00  
 P38: 1.00  
 P39: 1.00  
 P40: 1.00  
 P41: 1.00  
 P42: 1.00  
 P43: 1.00  
 P44: 1.00  
 P45: 1.00  
 P46: 1.00  
 P47: 1.00  
 P48: 1.00  
 P49: 1.00  
 P50: 1.00  
 P51: 1.00  
 P52: 1.00  
 P53: 1.00  
 P54: 1.00  
 P55: 1.00  
 P56: 1.00  
 P57: 1.00  
 P58: 1.00  
 P59: 1.00  
 P60: 1.00  
 P61: 1.00  
 P62: 1.00  
 P63: 1.00  
 P64: 1.00  
 P65: 1.00  
 P66: 1.00  
 P67: 1.00  
 P68: 1.00  
 P69: 1.00  
 P70: 1.00  
 P71: 1.00  
 P72: 1.00  
 P73: 1.00  
 P74: 1.00  
 P75: 1.00  
 P76: 1.00  
 P77: 1.00  
 P78: 1.00  
 P79: 1.00  
 P80: 1.00  
 P81: 1.00  
 P82: 1.00  
 P83: 1.00  
 P84: 1.00  
 P85: 1.00  
 P86: 1.00  
 P87: 1.00  
 P88: 1.00  
 P89: 1.00  
 P90: 1.00  
 P91: 1.00  
 P92: 1.00  
 P93: 1.00  
 P94: 1.00  
 P95: 1.00  
 P96: 1.00  
 P97: 1.00  
 P98: 1.00  
 P99: 1.00  
 P100: 1.00

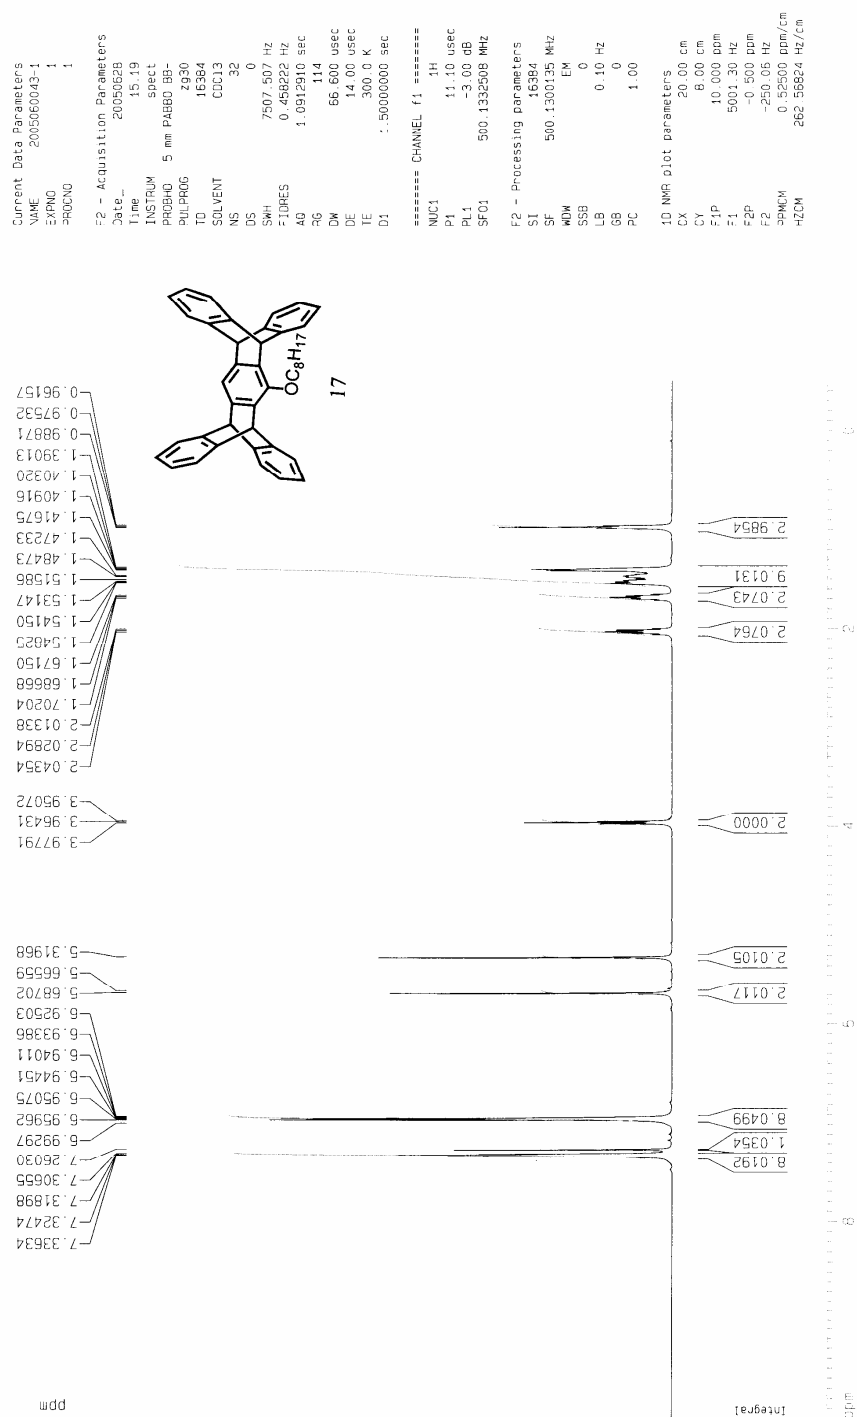

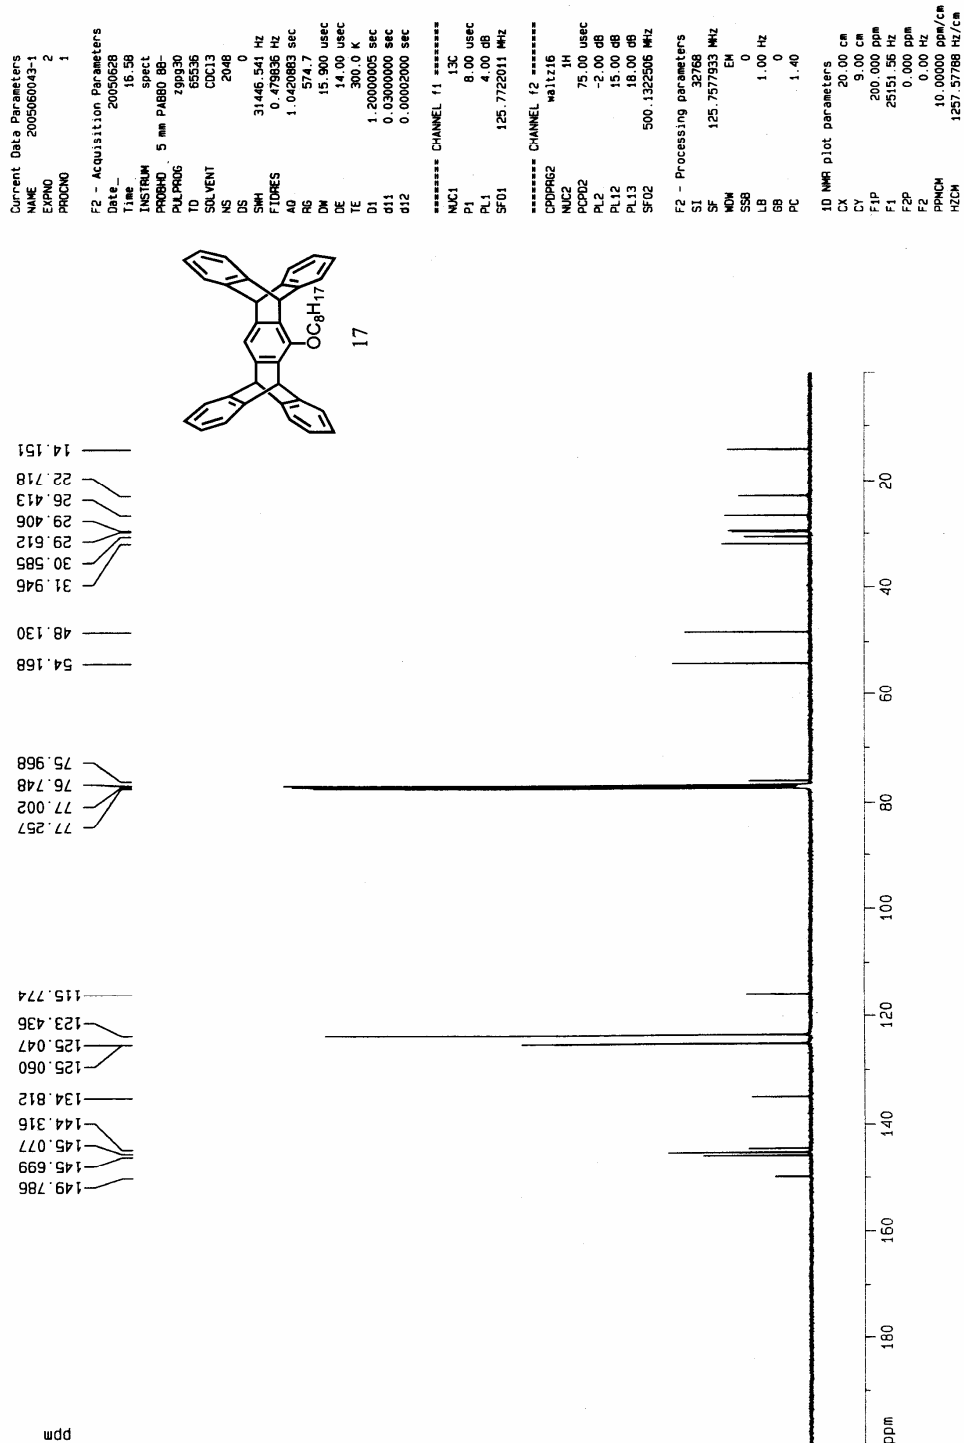

Current Data Parameters  
 Name: 2005091816  
 Date: 20050918  
 Time: 5:04  
 Operator: [illegible]  
 Sample: 5 mm tube  
 P1: 2.00  
 P2: 2.00  
 P3: 2.00  
 P4: 2.00  
 P5: 2.00  
 P6: 2.00  
 P7: 2.00  
 P8: 2.00  
 P9: 2.00  
 P10: 2.00  
 P11: 2.00  
 P12: 2.00  
 P13: 2.00  
 P14: 2.00  
 P15: 2.00  
 P16: 2.00  
 P17: 2.00  
 P18: 2.00  
 P19: 2.00  
 P20: 2.00  
 P21: 2.00  
 P22: 2.00  
 P23: 2.00  
 P24: 2.00  
 P25: 2.00  
 P26: 2.00  
 P27: 2.00  
 P28: 2.00  
 P29: 2.00  
 P30: 2.00  
 P31: 2.00  
 P32: 2.00  
 P33: 2.00  
 P34: 2.00  
 P35: 2.00  
 P36: 2.00  
 P37: 2.00  
 P38: 2.00  
 P39: 2.00  
 P40: 2.00  
 P41: 2.00  
 P42: 2.00  
 P43: 2.00  
 P44: 2.00  
 P45: 2.00  
 P46: 2.00  
 P47: 2.00  
 P48: 2.00  
 P49: 2.00  
 P50: 2.00  
 P51: 2.00  
 P52: 2.00  
 P53: 2.00  
 P54: 2.00  
 P55: 2.00  
 P56: 2.00  
 P57: 2.00  
 P58: 2.00  
 P59: 2.00  
 P60: 2.00  
 P61: 2.00  
 P62: 2.00  
 P63: 2.00  
 P64: 2.00  
 P65: 2.00  
 P66: 2.00  
 P67: 2.00  
 P68: 2.00  
 P69: 2.00  
 P70: 2.00  
 P71: 2.00  
 P72: 2.00  
 P73: 2.00  
 P74: 2.00  
 P75: 2.00  
 P76: 2.00  
 P77: 2.00  
 P78: 2.00  
 P79: 2.00  
 P80: 2.00  
 P81: 2.00  
 P82: 2.00  
 P83: 2.00  
 P84: 2.00  
 P85: 2.00  
 P86: 2.00  
 P87: 2.00  
 P88: 2.00  
 P89: 2.00  
 P90: 2.00  
 P91: 2.00  
 P92: 2.00  
 P93: 2.00  
 P94: 2.00  
 P95: 2.00  
 P96: 2.00  
 P97: 2.00  
 P98: 2.00  
 P99: 2.00  
 P100: 2.00

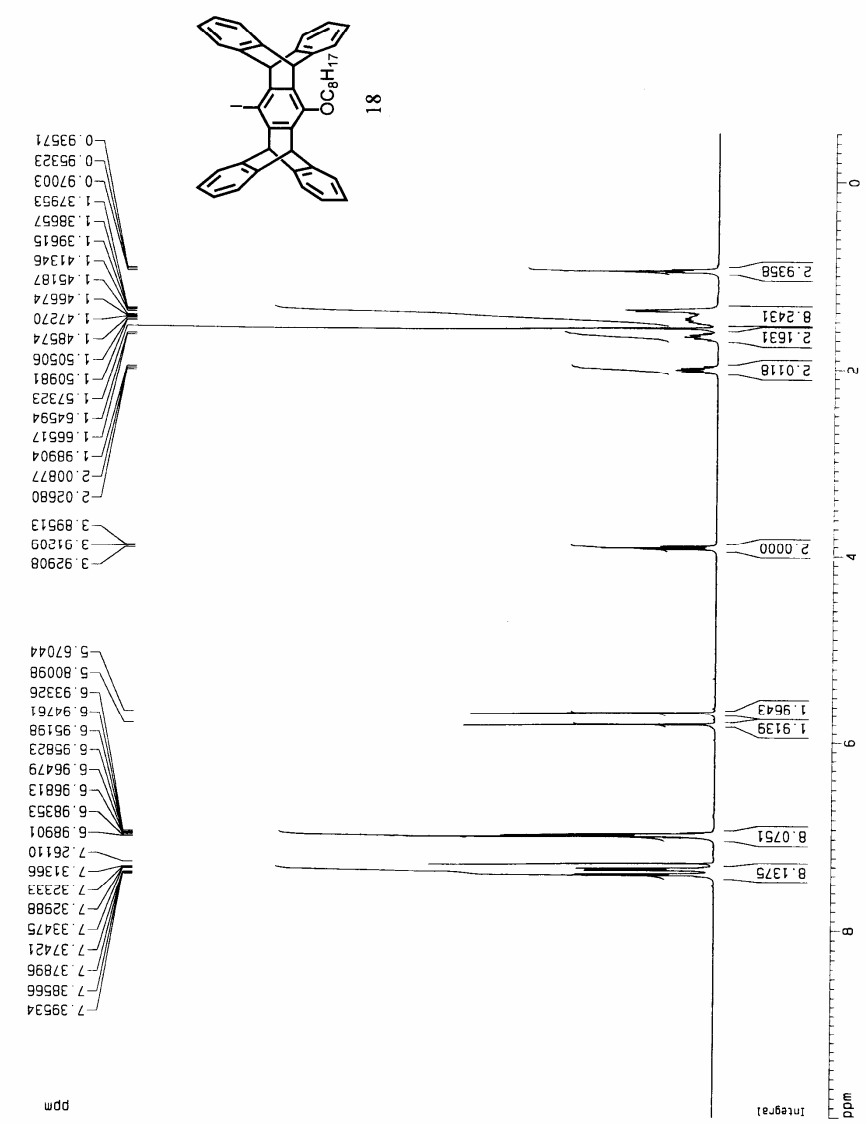

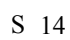

Current Data Parameters  
NAME 200507018-2  
EXPNO 2  
PROCNO 1

F2 - Acquisition Parameters  
Date\_ 20050714  
Time 18.31  
INSTRUM spect  
PROBHD 5 mm PABBO BB-  
PULPROG zg30  
TD 16384  
SOLVENT CDCl3  
NS 32  
DS 0  
SWH 7507.507 Hz  
FIDRES 0.458222 Hz  
AQ 1.0912910 sec  
RG 71.8  
DM 65.600 usec  
DE 14.00 usec  
TE 300.0 K  
D1 1.50000000 sec

\*\*\*\*\* CHANNEL f1 \*\*\*\*\*  
NUC1 <sup>1</sup>H  
P1 11.10 usec  
PL1 -3.00 dB  
SF01 500.1332508 MHz

F2 - Processing parameters  
SI 16384  
SF 500.1300135 MHz  
WDW EM  
SSB 0  
LB 0.10 Hz  
GB 0  
PC 1.00

1D NMR plot parameters  
CX 20.00 cm  
CY 8.00 cm  
F1P 10.000 ppm  
F1 5001.30 Hz  
F2P -0.500 ppm  
F2 -250.06 Hz  
PPMCM 0.52500 ppm/cm  
HZCM 262.56824 Hz/cm

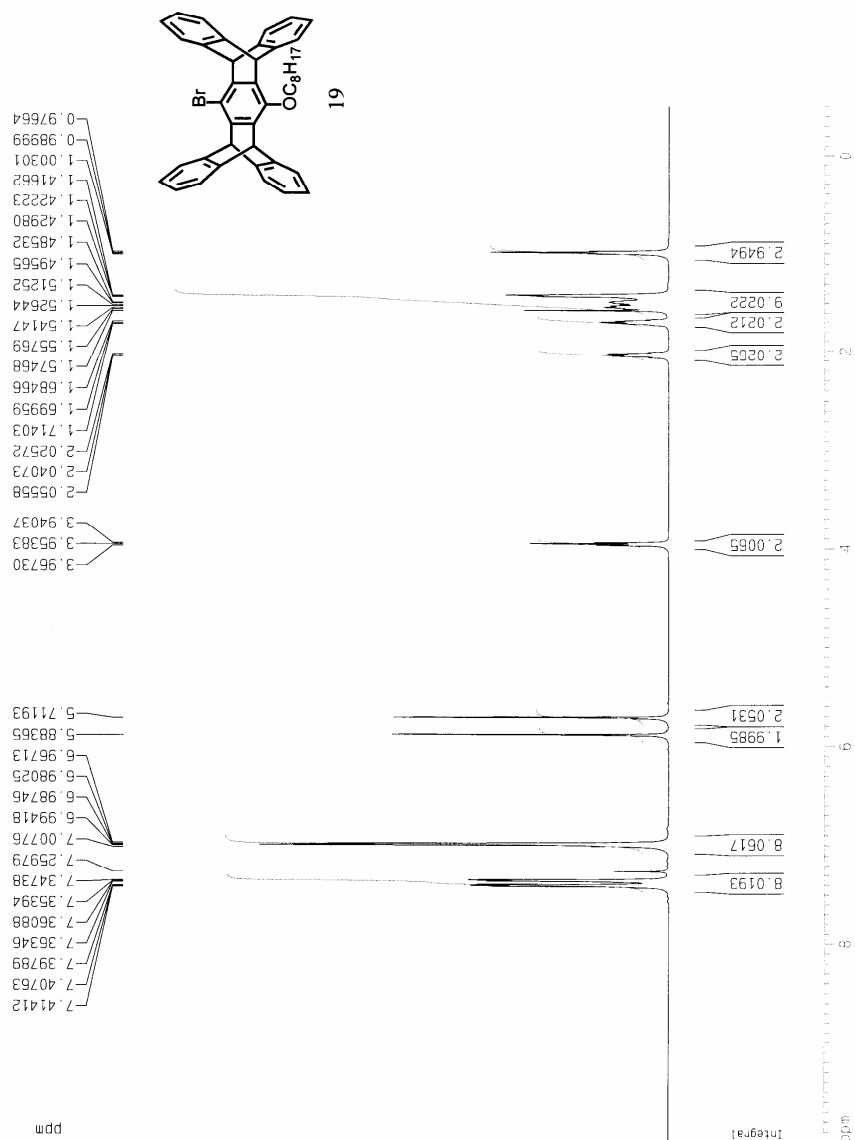

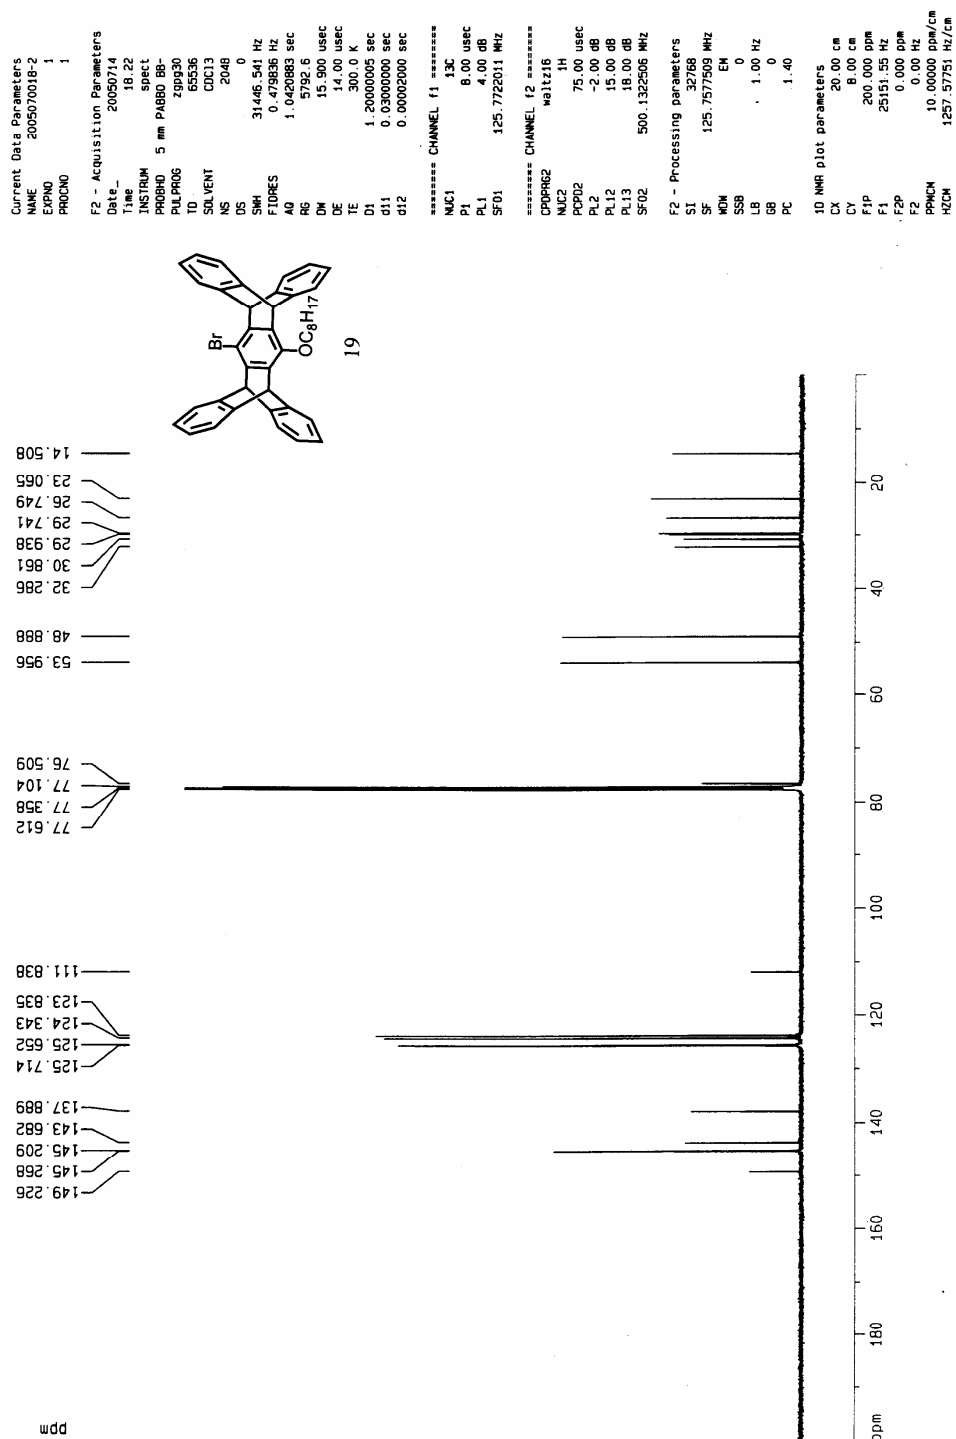



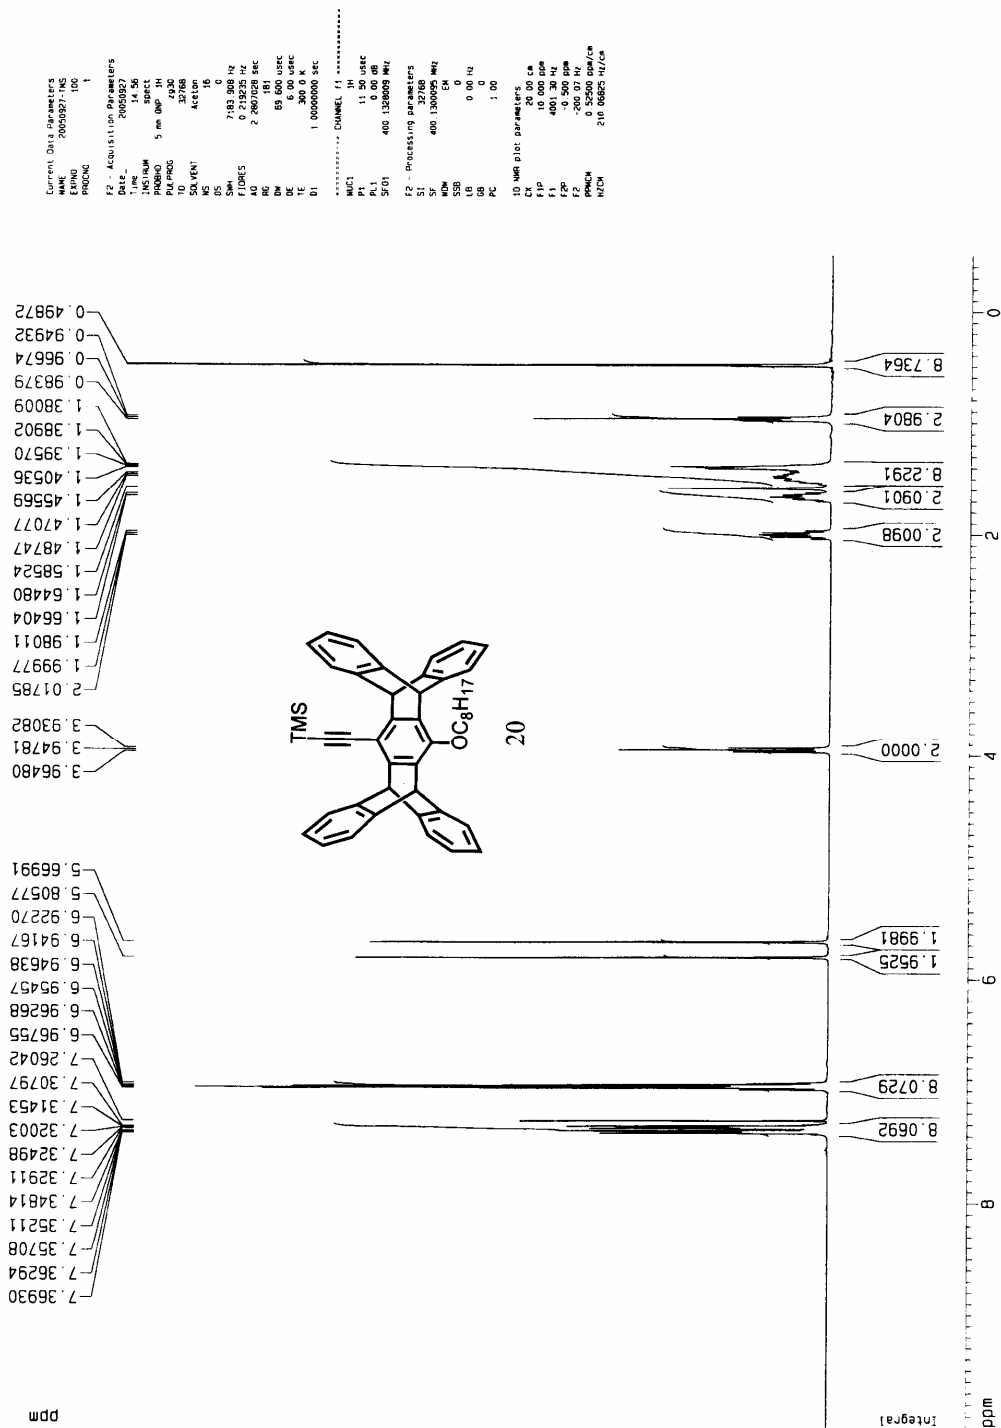

Current Data Parameters  
 NAME: 20050527\_1000000000  
 EXPNO: 1  
 PROCNO: 1

F2 - Acquisition Parameters  
 Date\_ Time: 20050527 22:51  
 INSTRUM: spect  
 PULPROG: zgpg30  
 TOU: 5.00  
 SOLVENT: CDCl3  
 NS: 7188  
 DS: 4  
 SWH: 20178.0 Hz  
 FIDRES: 0.398445 Hz  
 AQ: 1.2517875 sec  
 RG: 327.5  
 DW: 19.100 usec  
 DE: 10.00 usec  
 TE: 300.0 K  
 D1: 0.0000000 sec  
 d11: 0.0000000 sec  
 d12: 0.0000000 sec

\*\*\*\*\* CHANNEL f1 \*\*\*\*\*  
 NU1: 13C  
 P1: 5.50 usec  
 PL1: -3.00 dB  
 SFO1: 100.6248025 MHz

\*\*\*\*\* CHANNEL f2 \*\*\*\*\*  
 CPDPRG2: waltz16  
 NU2: 1H  
 P2: 88.00 usec  
 PL2: 120.00 dB  
 PL12: 16.00 dB  
 PL13: 22.00 dB  
 SFO2: 400.1318000 MHz

F2 - Processing parameters  
 SI: 32768  
 SF: 100.6127650 MHz  
 WDW: EM  
 SSB: 0  
 LB: 1.00 Hz  
 GB: 0  
 PC: 0.00

1D NMR D101 Parameters  
 CH: 20.00 cm  
 FIDRES: 0.398445 Hz  
 F1: 17104.17 Hz  
 F2P: -10.000 ppm  
 F2: -10006.13 Hz  
 FIDRES: 0.398445 Hz  
 AQ: 1.2517875 sec  
 RG: 327.5  
 DW: 19.100 usec  
 DE: 10.00 usec  
 TE: 300.0 K  
 D1: 0.0000000 sec  
 d11: 0.0000000 sec  
 d12: 0.0000000 sec

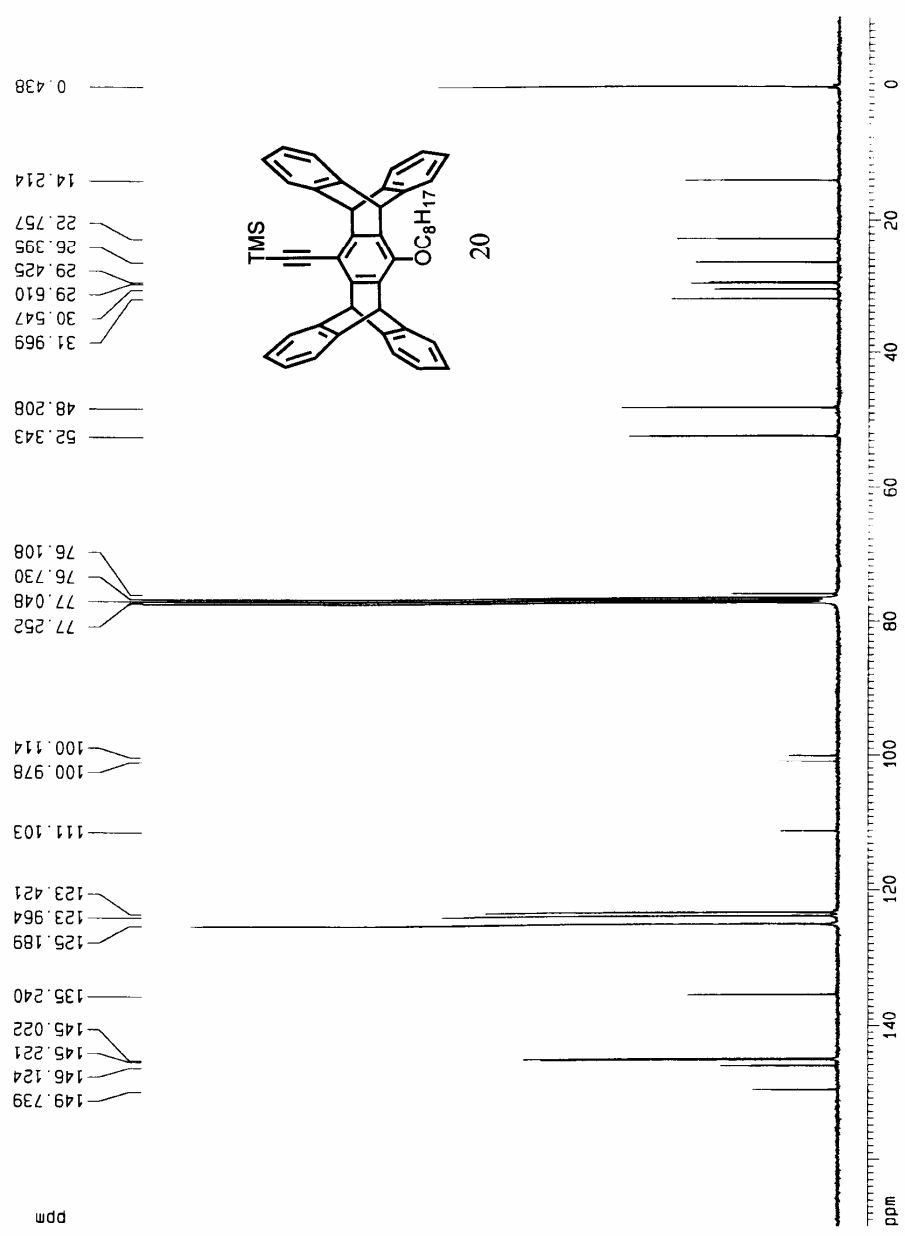

Current Data Parameters  
NAME million  
EXPNO 100105  
PROCNO 1

F2 - Acquisition Parameters  
Date\_ 20050717  
Time 19.14  
INSTRUM spect  
PROBHD 5 mm PABBO BB-  
PULPROG zg30  
TD 16384  
SOLVENT COCl3  
NS 8  
DS 0  
SMH 7507.507 Hz  
FIDRES 0.458222 Hz  
AQ 1.0912910 sec  
RG 406.4  
DM 66.600 usec  
DE 14.00 usec  
TE 300.0 K  
D1 1.50000000 sec

===== CHANNEL f1 =====  
NUC1 <sup>31</sup>H  
P1 11.10 usec  
PL1 -3.00 dB  
SF01 500.1332508 MHz

F2 - Processing parameters  
SI 16384  
SF 500.1300135 MHz  
WDW EM  
SSB 0  
LB 0.10 Hz  
GB 0  
PC 1.00

1D NMR plot parameters  
CX 20.00 cm  
CY 6.00 cm  
FIP 10.000 ppm  
F1 5001.30 Hz  
F2P -0.500 ppm  
F2 -250.06 Hz  
PPMCH 0.52500 ppm/cm  
HZCM 262.56824 Hz/cm

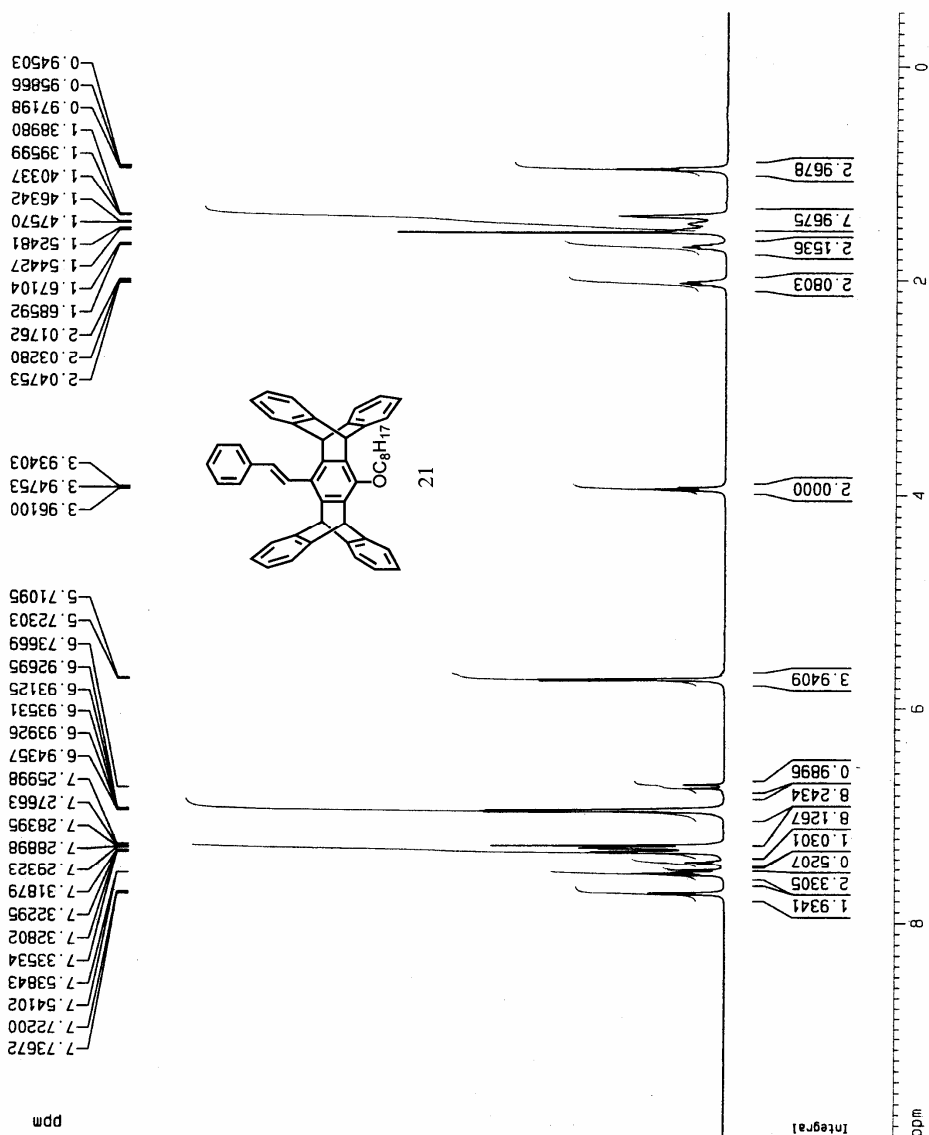

Current Data Parameters  
NAME million  
EXPNO 100106  
PROCNO 1

F2 - Acquisition Parameters  
Date\_ 20050718  
Time 7.25  
INSTRUM spect  
PROBHD 5 mm PABBO BB-  
PULPROG zgpg30  
TD 65536  
SOLVENT CDCl3  
NS 19360  
DS 0  
SWH 31446.541 Hz  
FIDRES 0.475836 Hz  
AQ 1.042683 sec  
RG 1625.5  
DM 15.900 usec  
DE 14.00 usec  
TE 300.0 K  
D1 1.20000005 sec  
d11 0.03000000 sec  
d12 0.00002000 sec

===== CHANNEL f1 =====  
NUC1 13C  
P1 8.00 usec  
PL1 4.00 dB  
SF01 125.7722011 MHz

===== CHANNEL f2 =====  
CPDPRG2 waltz16  
NUC2 1H  
PCPD2 75.00 usec  
PL2 -2.00 dB  
PL12 15.00 dB  
PL13 18.00 dB  
SF02 500.1322506 MHz

F2 - Processing parameters  
SI 32768  
SF 125.7577304 MHz  
WDW EN  
SSB 0  
LB 1.00 Hz  
GB 0  
PC 1.40

1D NMR plot parameters  
CX 20.00 cm  
CY 10.00 cm  
F1P 160.000 ppm  
F1 20121.25 Hz  
F2P 0.000 ppm  
F2 0.00 Hz  
PPMCM 8.00000 ppm/cm  
HZCM 1005.06252 Hz/cm

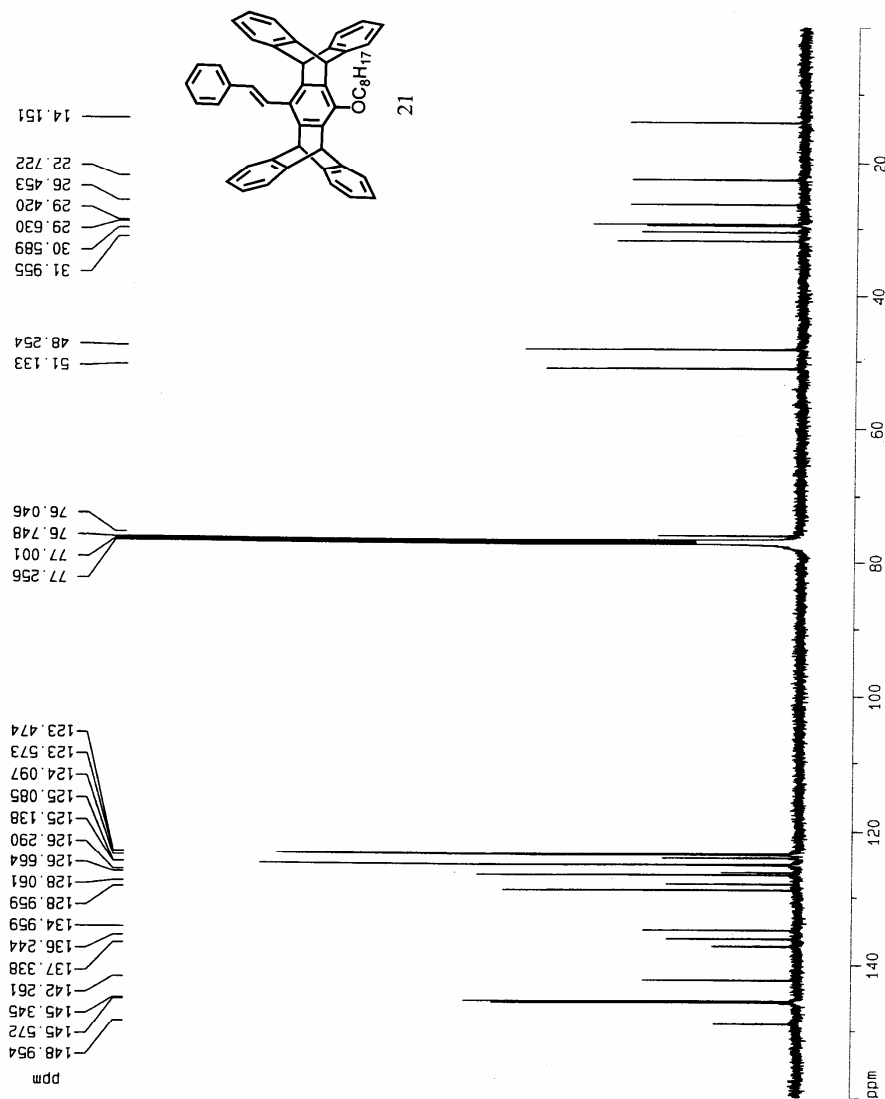

Current Data Parameters  
NAME million  
EXPNO 100096  
PROCNO 1

F2 - Acquisition Parameters  
Date\_ 20050708  
Time 23.15  
INSTRUM spect  
PROBHD 5 mm PABBO BB-  
PULPROG zg30  
TD 16384  
SOLVENT CDCl3  
NS 8  
DS 0  
SWH 7507.507 Hz  
FIDRES 0.458222 Hz  
AQ 1.0912910 sec  
RG 143.7  
DM 66.600 usec  
DE 14.00 usec  
TE 300.0 K  
D1 1.5000000 sec

===== CHANNEL f1 =====  
NUC1 1H  
P1 11.10 usec  
PL1 -3.00 dB  
SF01 500.1332508 MHz

F2 - Processing parameters  
SI 16384  
SF 500.1300135 MHz  
WDW EM  
SSB 0  
LB 0.10 Hz  
GB 0  
PC 1.00

1D NMR plot parameters  
CX 20.00 cm  
CY 4.00 cm  
FIP 10.000 ppm  
F1 5001.30 Hz  
F2 -250.06 Hz  
PPMCM 0.52500 ppm/cm  
HZCM 262.56824 Hz/cm

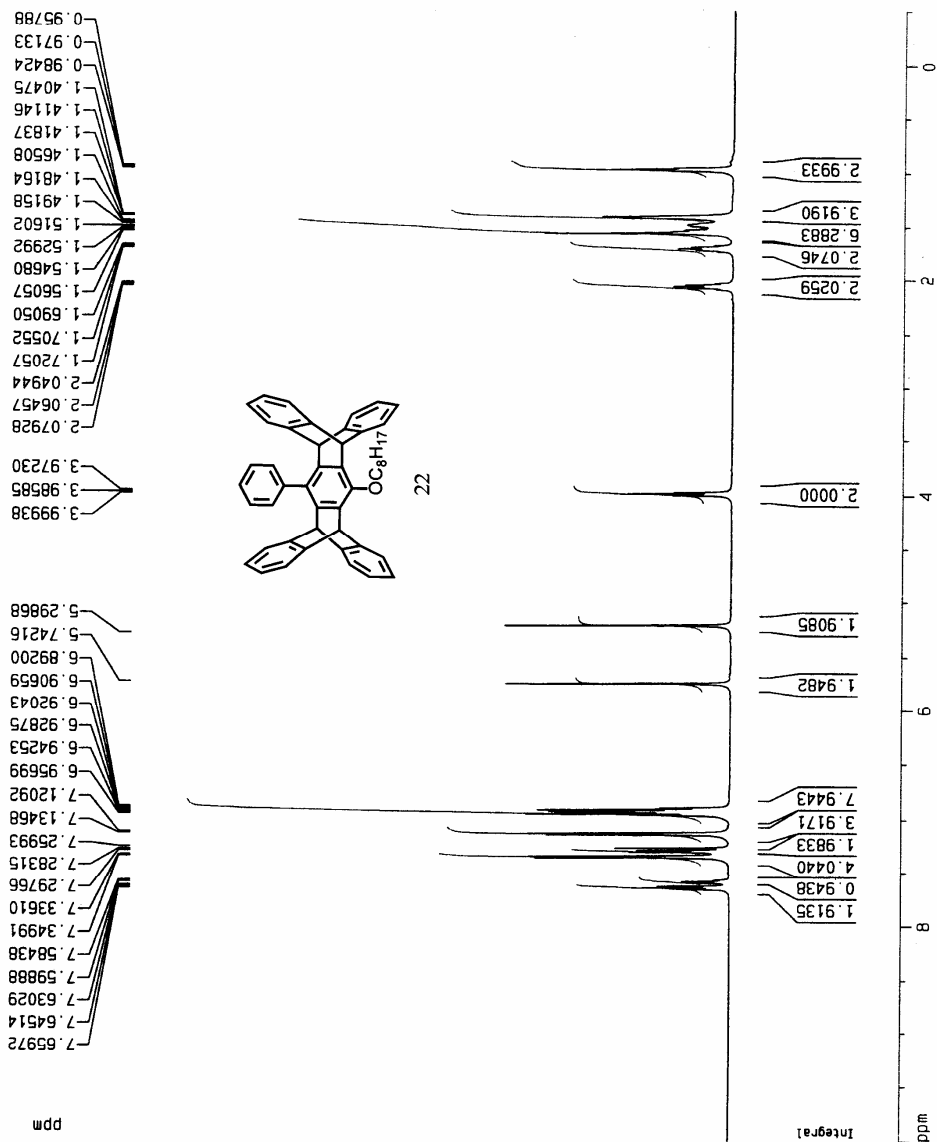

Current Data Parameters  
NAME 200507032-1  
EXPNO 2  
PROCNO 1

F2 - Acquisition Parameters  
Date\_ 20050724  
Time 7.07  
INSTRUM spect  
PROBHD 5 mm PABBO BB-  
PULPROG zgpg30  
TO 65536  
SOLVENT CDCl3  
NS 12288  
DS 0  
SWH 31446.541 Hz  
FIDRES 0.479636 Hz  
AQ 1.0420883 sec  
RG 1824.6  
DM 15.900 usec  
DE 14.00 usec  
TE 300.0 K  
D1 1.20000005 sec  
d11 0.03000000 sec  
d12 0.00020000 sec

===== CHANNEL f1 =====  
NUC1 13C  
P1 8.00 usec  
PL1 4.00 dB  
SFO1 125.772011 MHz

===== CHANNEL f2 =====  
CPDPRG2 waltz16  
NUC2 1H  
PCPD2 75.00 usec  
PL2 -2.00 dB  
PL12 15.00 dB  
PL13 18.00 dB  
SFO2 500.1322506 MHz

F2 - Processing parameters  
SI 32768  
SF 125.7577452 MHz  
WDW EM  
SSB 0  
LB 1.00 Hz  
GB 0  
PC 1.40

1D NMR plot parameters  
CX 20.00 cm  
CY 10.00 cm  
FIP 180.000 ppm  
F1 22636.39 Hz  
F2P 0.000 ppm  
F2 0.00 Hz  
PPMCH 9.00000 ppm/cm  
HZCM 1131.81970 Hz/cm

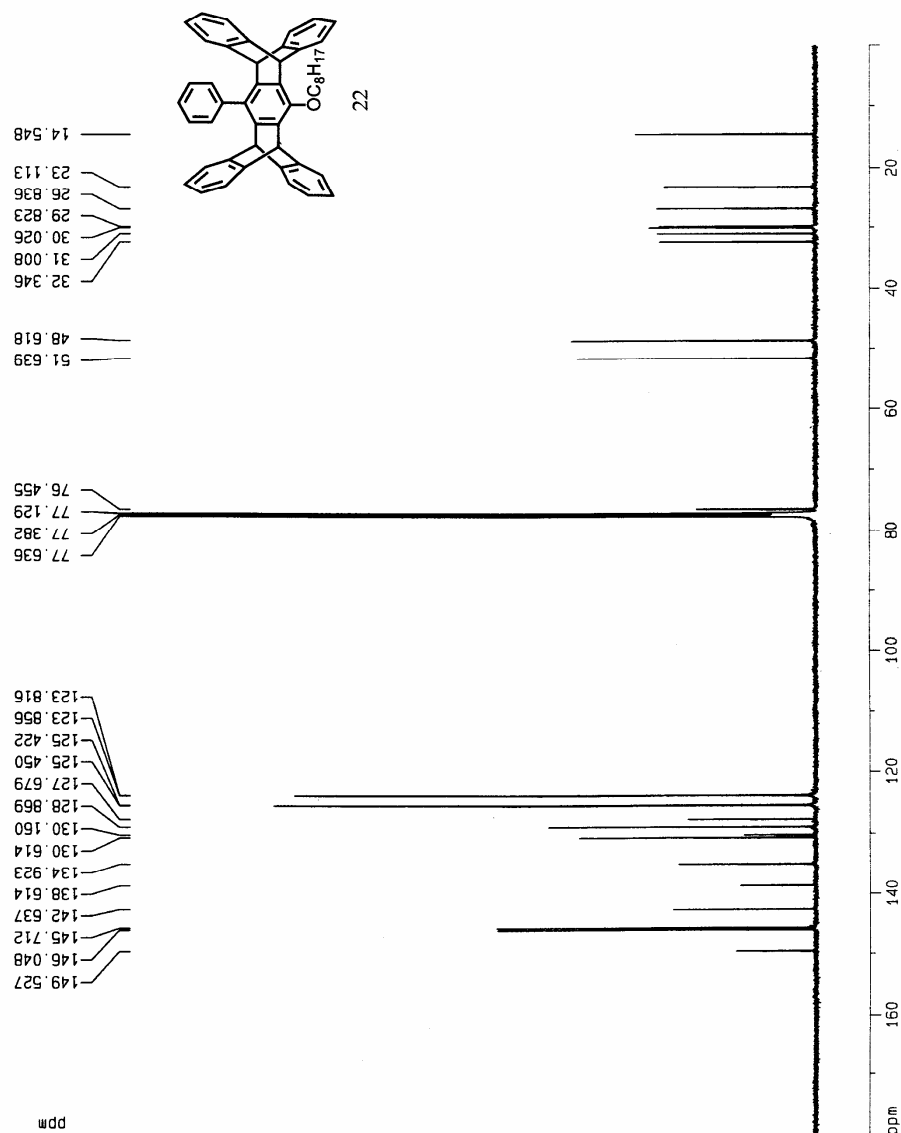

Current Data Parameters  
 NAME 200507030-1  
 EXPNO 2  
 PROCNO 1

F2 - Acquisition Parameters  
 Date\_ 20050722  
 Time 5.00

INSTRUM spect  
 PROBHD 5 mm PABBO BB-  
 PULPROG zgpg30  
 TO 65536  
 SOLVENT CUC13  
 NS 16384  
 DS 0

SWH 31446.541 Hz  
 FIDRES 0.479836 Hz  
 AQ 1.0420883 sec  
 RG 2580.3  
 DM 15.900 usec  
 DE 14.00 usec  
 TE 300.0 K  
 D1 1.2000005 sec  
 d11 0.0300000 sec  
 d12 0.0002500 sec

----- CHANNEL f1 -----  
 NUC1 13C  
 P1 8.00 usec  
 PL1 4.00 dB  
 SF01 125.7722011 MHz

----- CHANNEL f2 -----  
 CPOPRG2 waltz16  
 NUC2 1H  
 PCPD2 75.00 usec  
 PL2 -2.00 dB  
 PL12 15.00 dB  
 PL13 16.00 dB  
 SF02 500.1322508 MHz

F2 - Processing parameters  
 SI 16384  
 SF 500.1300135 MHz  
 WDW EN  
 SSB 0  
 LB 0.10 Hz  
 GB 0  
 PC 1.00

1D NMR plot parameters  
 CX 20.00 cm  
 CY 8.00 cm  
 F1P 10.000 ppm  
 F1 5001.30 Hz  
 F2P -0.500 ppm  
 F2 -250.06 Hz  
 PPMCH 0.52500 ppm/cm  
 HZCM 262.55624 Hz/cm

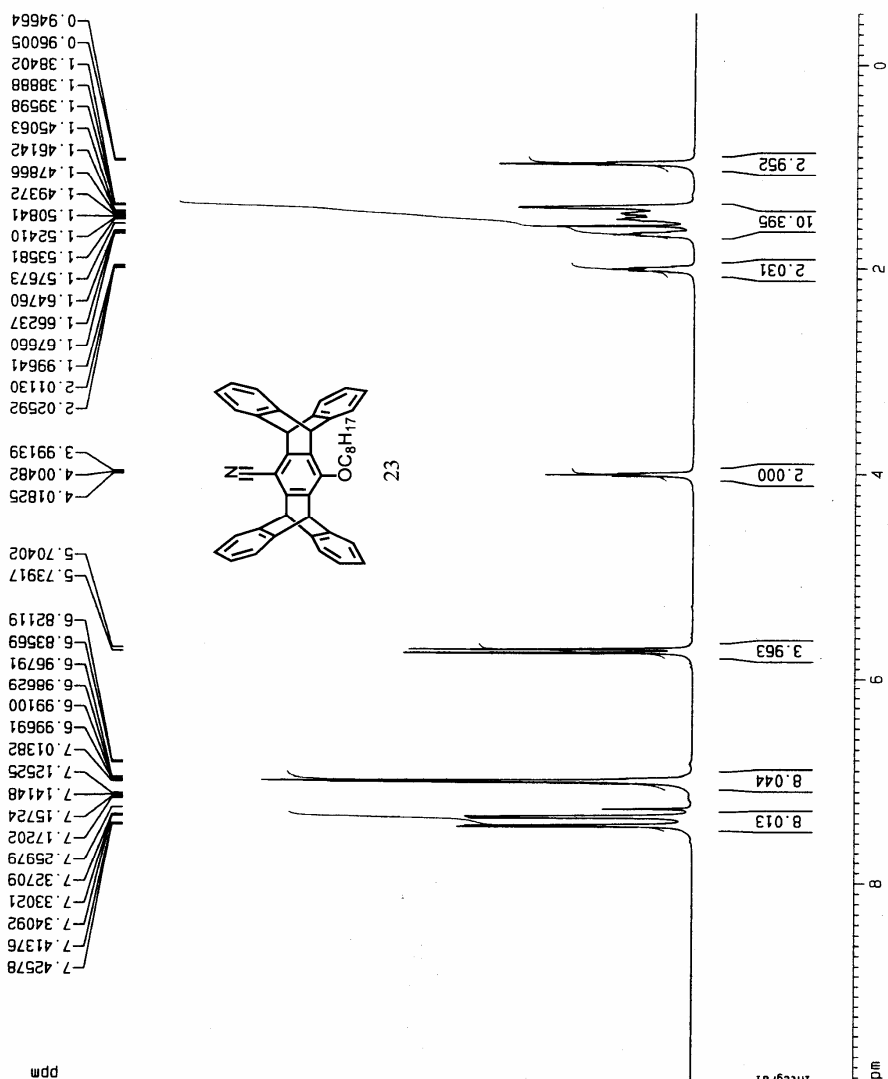

Current Data Parameters  
NAME 200507030-1  
EXPNO 2  
PROCNO 2

F2 - Acquisition Parameters  
Date\_ 20050722  
Time 5.00  
INSTRUM spect  
PROBHD 5 mm PABBO BB  
PULPROG zgpg30  
TD 65536  
SOLVENT CDCl3  
NS 16384  
DS 0  
SWH 31446.541 Hz  
FIDRES 0.479835 Hz  
AQ 1.042083 sec  
RG 2560.3  
DM 15.900 usec  
DE 14.00 usec  
TE 300.0 K  
D1 1.2000005 sec  
d11 0.0300000 sec  
d12 0.0002000 sec

===== CHANNEL f1 =====  
NUC1 13C  
P1 8.00 usec  
PL1 4.00 dB  
SF01 125.772011 MHz

===== CHANNEL f2 =====  
CPDPRG2 waltz16  
NUC2 1H  
PCPD2 75.00 usec  
PL2 -2.00 dB  
PL12 15.00 dB  
PL13 18.00 dB  
SF02 500.1322506 MHz

F2 - Processing parameters  
SI 32768  
SF 125.7577490 MHz  
WDW EM  
SSB 0  
LB 1.00 Hz  
GB 0  
PC 1.40

1D NMR plot parameters  
CX 20.00 cm  
CY 8.00 cm  
F1P 180.000 ppm  
F1 22636.39 Hz  
F2P 0.000 ppm  
F2 0.00 Hz  
PPMCM 9.00000 ppm/cm  
HZCM 1131.81970 Hz/cm

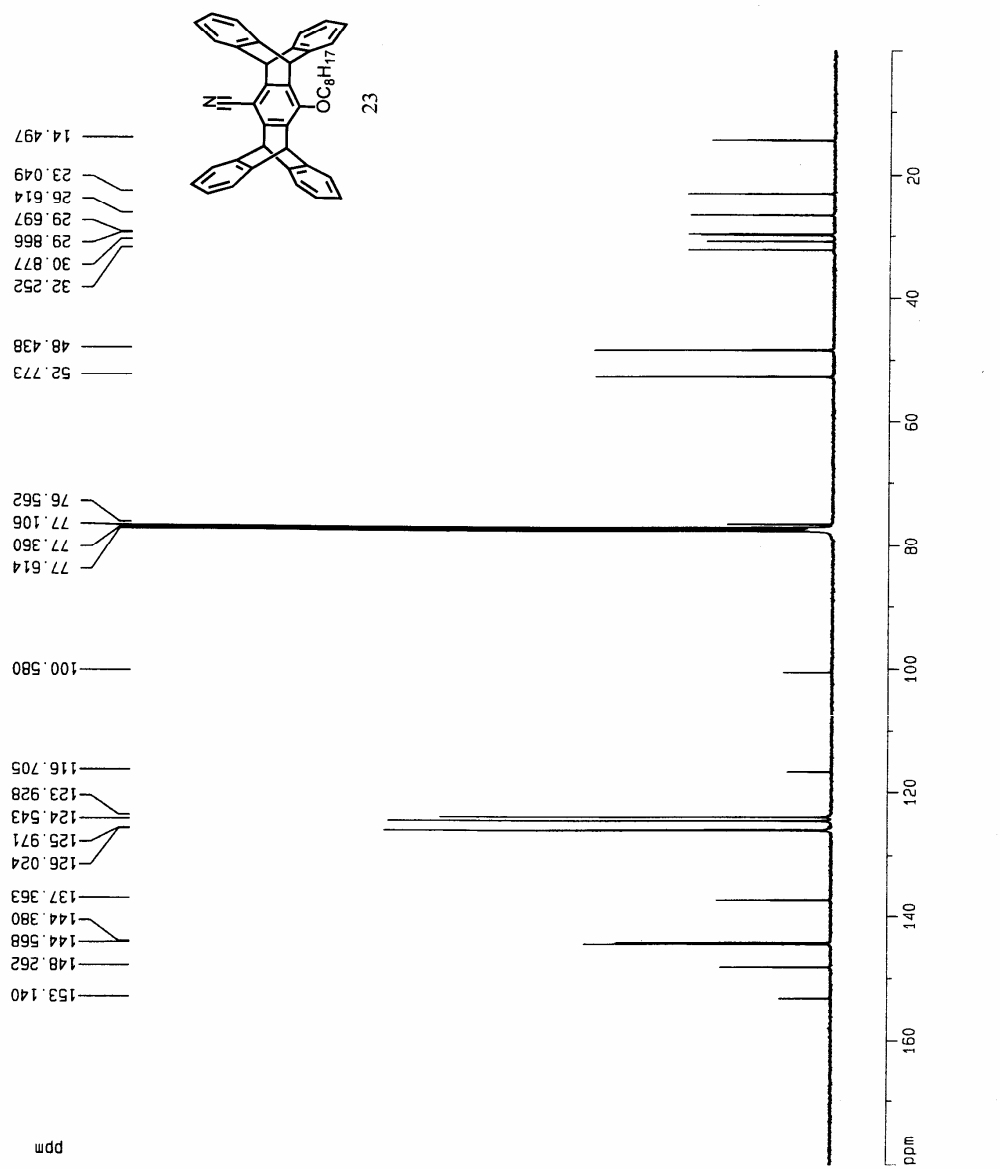



Current Data Parameters  
NAME chinwei  
EXPNO 10  
PROCNO 1

F2 - Acquisition Parameters  
Date\_ 20050723  
Time 17:56  
INSTRUM spect  
PROBHD 5 mm PABBO BB-  
PULPROG zg30  
TO 16384  
SOLVENT CDCl3  
NS 32  
DS 0  
SWH 7507.507 Hz  
FIDRES 0.456222 Hz  
AQ 1.0912910 sec  
RG 143.7  
DM 66.600 usec  
DE 14.00 usec  
TE 300.0 K  
D1 1.5000000 sec

===== CHANNEL f1 =====  
NUC1 <sup>1</sup>H  
P1 11.10 usec  
PL1 -3.00 dB  
SF01 500.1332508 MHz

F2 - Processing parameters  
SI 16384  
SF 500.130035 MHz  
WDW EN  
SSB 0  
LB 0.10 Hz  
GB 0  
PC 1.00

1D NMR plot parameters  
CX 20.00 cm  
CY 8.00 cm  
FIP 12.000 ppm  
F1 6001.56 Hz  
F2P -0.500 ppm  
F2 -250.07 Hz  
PPMCM 0.62500 ppm/cm  
HZCM 312.58127 Hz/cm

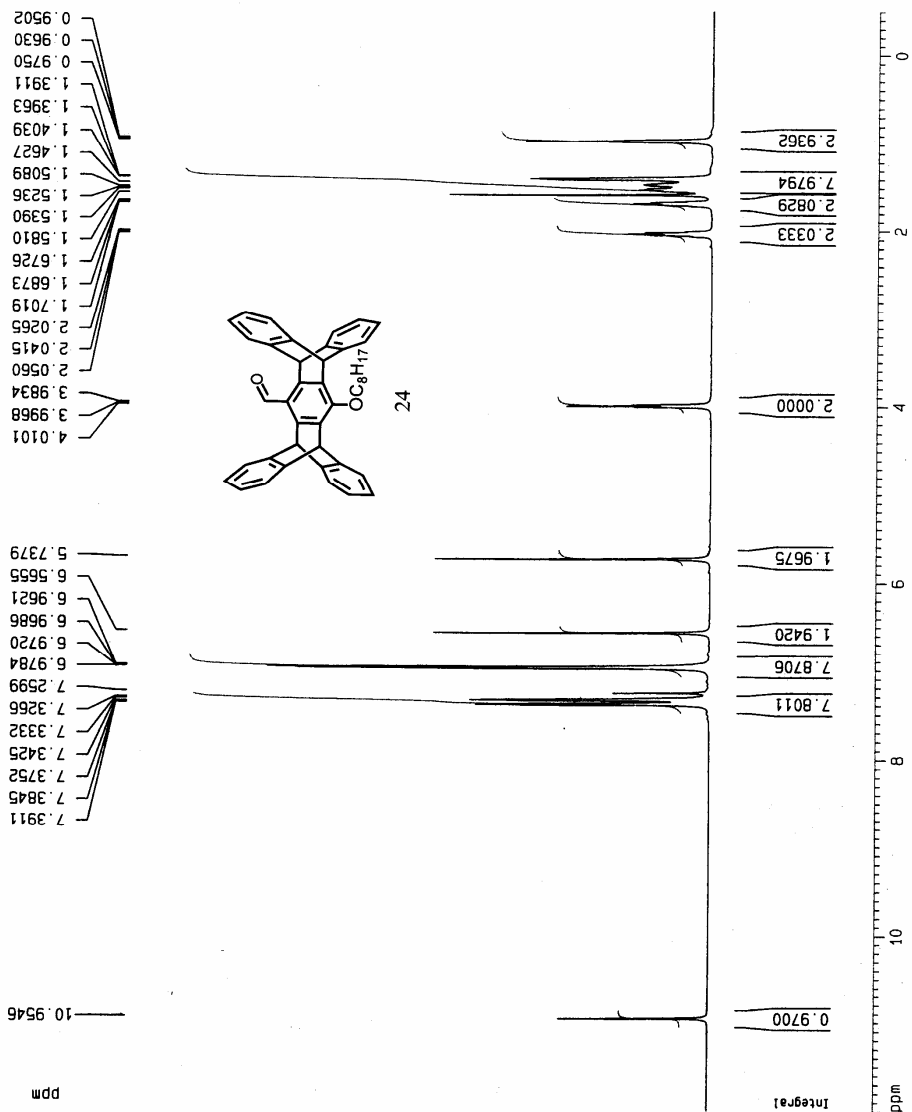

Current Data Parameters  
NAME 2005070030-1  
EXPNO 1  
PROCNO 1

F2 - Acquisition Parameters  
Date\_ 20050721  
Time 9.23  
INSTRUM spect  
PROBHD 5 mm PA880 BB-  
PULPROG zgpg30  
TD 65536  
SOLVENT CDCl3  
NS 16384  
DS 0  
SWH 31446.541 Hz  
FIDRES 0.479836 Hz  
AQ 1.0450883 sec  
RG 592.6  
OW 15.900 usec  
DE 14.00 usec  
TE 300.0 K  
D1 1.2000005 sec  
d11 0.0300000 sec  
d12 0.0002000 sec

===== CHANNEL f1 =====  
NUC1 13C  
P1 8.00 usec  
PL1 4.00 dB  
SFO1 125.7722011 MHz

===== CHANNEL f2 =====  
CPDPRG2 waltz16  
NUC2 1H  
PCPD2 75.00 usec  
PL2 -2.00 dB  
PL12 15.00 dB  
PL13 18.00 dB  
SFO2 500.1322506 MHz

F2 - Processing parameters  
SI 32768  
SF 125.7577481 MHz  
WDW EN  
SSB 0  
LB 1.00 Hz  
GB 0  
PC 1.40

1D NMR plot parameters  
CX 20.00 cm  
CY 9.00 cm  
F1P 200.000 ppm  
F1 25151.55 Hz  
F2P 0.000 ppm  
F2 0.00 Hz  
PPMCH 10.00000 ppm/cm  
HZCM 1257.57751 Hz/cm

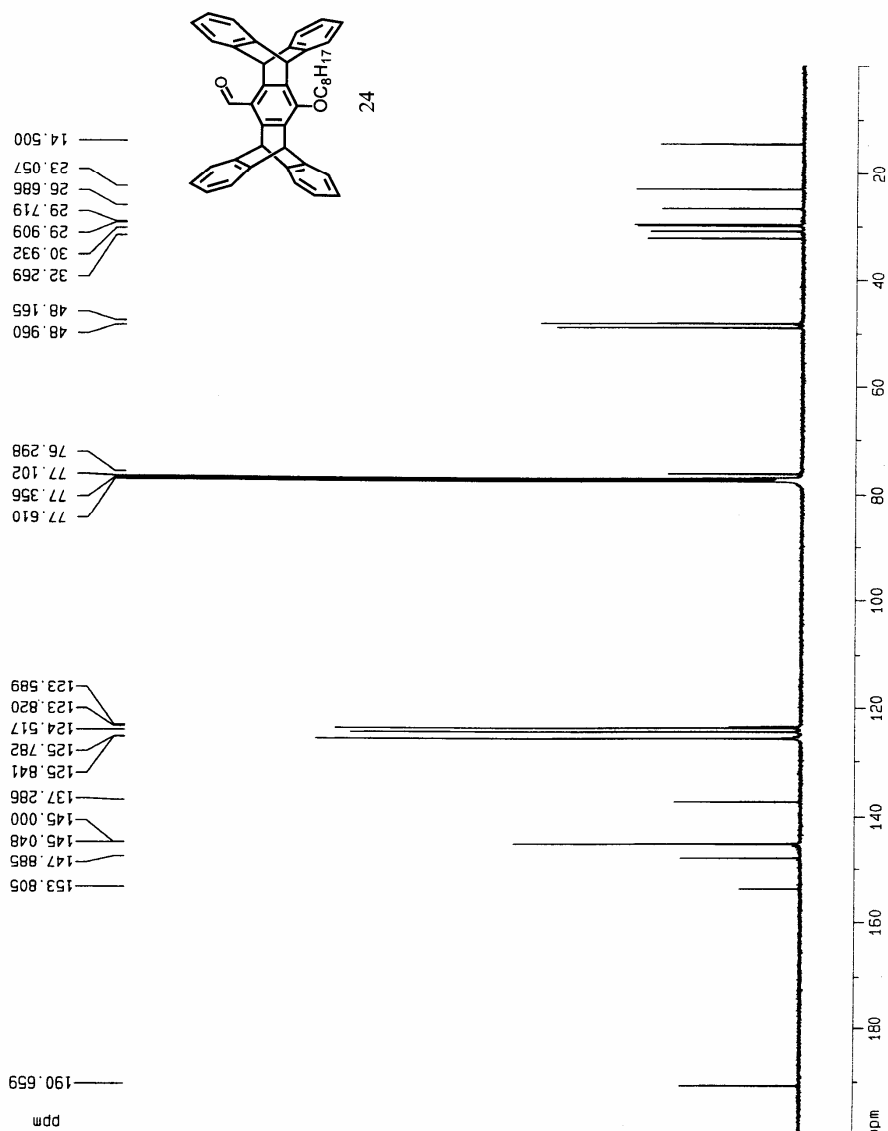

Supplement: Supplementary file 1 [file 5076973]
